# Supplementary material
Source: publisher figshare collection journal article supplement (https://gsajournals.figshare.com/articles/dataset/_/8949227)
Supplement: Supplementary file 1 [file 1]

Figure S10

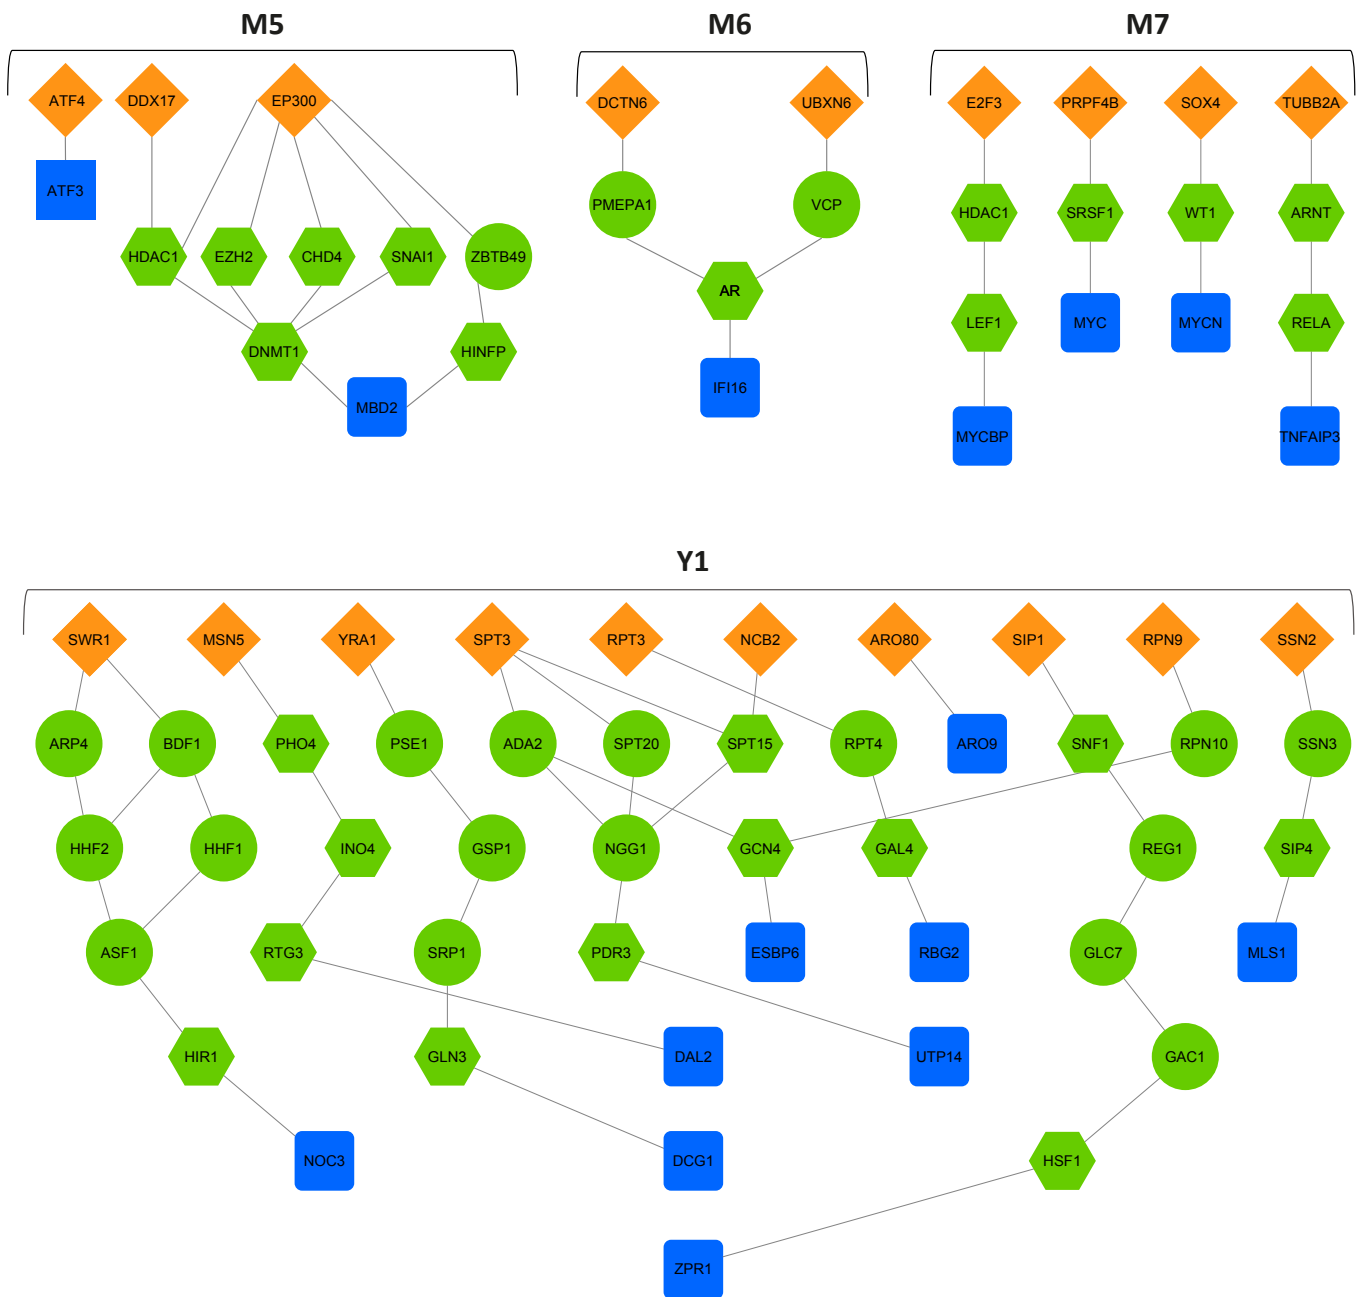

InPhenotype prediction:

Gene, nearby predicted SNP

Predicted gene

ResponseNet pathway:

Protein

Gene

**Figure S10.** Molecular pathways through which genes within the identified loci may interact with the identified genes. Shown are pathways for large modules (number of genes > 4), using the ResponseNet algorithm, applied either on the modules of mouse (**top**) or yeast (**bottom**).
