# Supplementary material
Source: publisher figshare collection journal article supplement (https://gsajournals.figshare.com/articles/dataset/_/8949227)
Supplement: Supplementary file 2 [file 1]

**Figure S2**

**A The training phase**

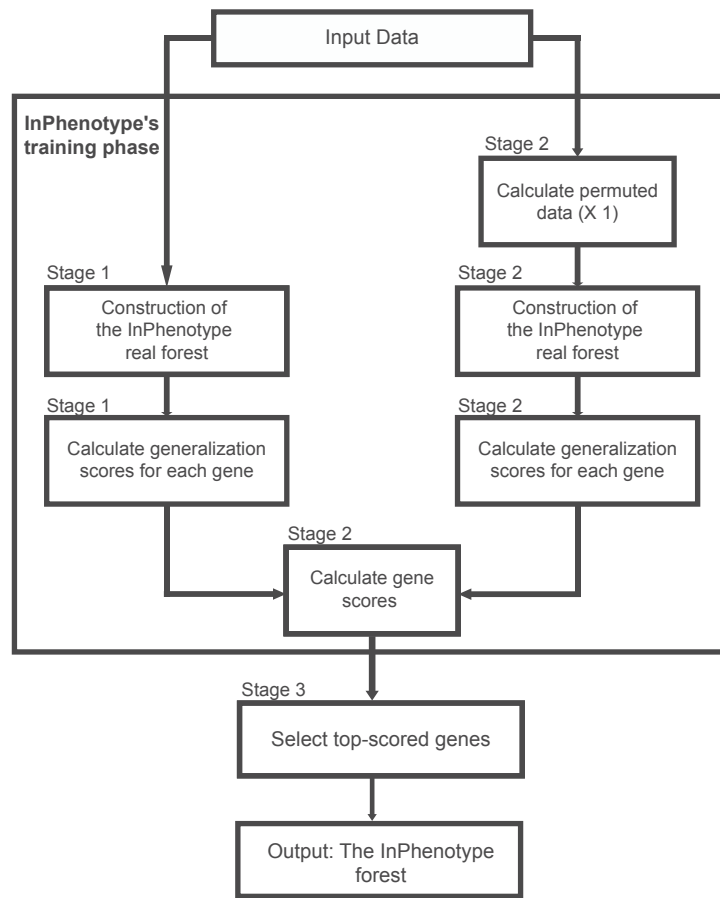

**B The interpretability phase**

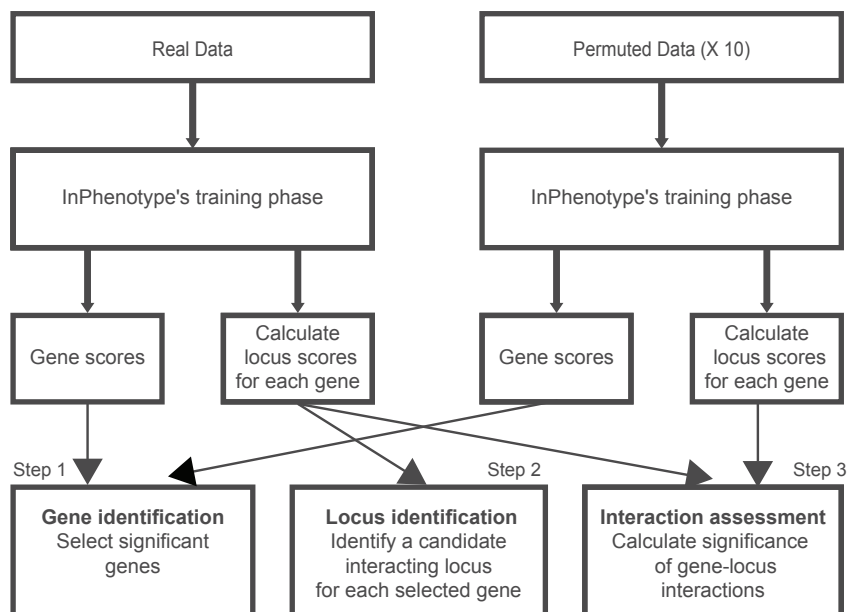

**Figure S2. Illustration of the InPhenotype algorithm. (A) The training phase. (B) the interpretability phase.**
