# Supplementary material
Source: publisher figshare collection journal article supplement (https://gsajournals.figshare.com/articles/dataset/_/8949227)
Supplement: Supplementary file 3 [file 1]

**Figure S6**

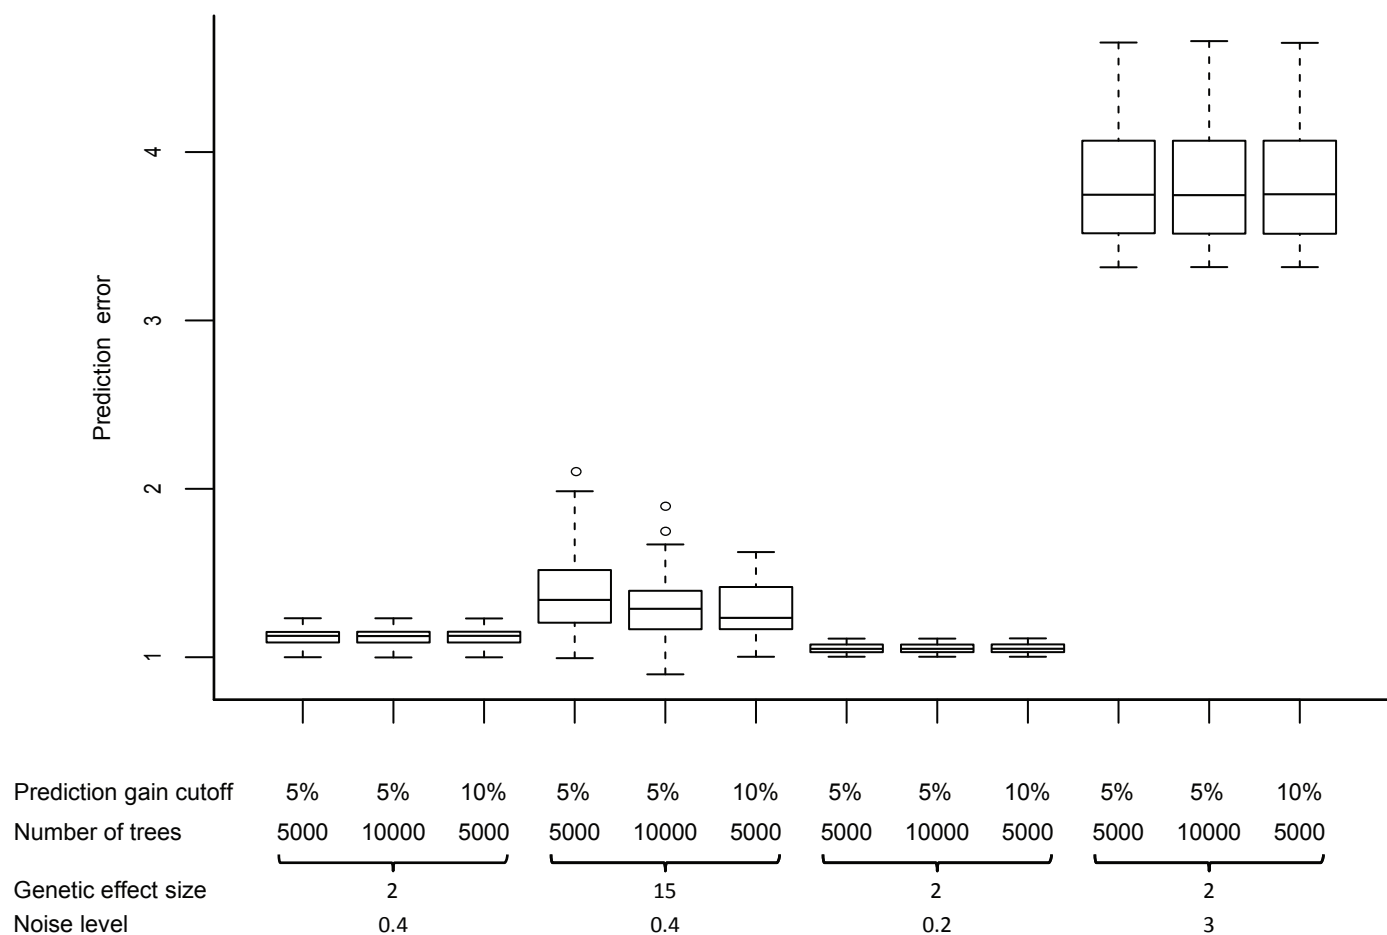

**Figure S6. InPhenotype is robust to different method parameters.** Shown are prediction errors (y axis) in different data parameters (genetic effect size and noise level) and different method parameters (prediction gain cutoff and number of trees; x axis). The comparison indicates that the performance of InPhenotype does not depend on a specific parameter setting.
