# Supplementary material
Source: publisher figshare collection journal article supplement (https://gsajournals.figshare.com/articles/dataset/_/8949227)
Supplement: Supplementary file 8 [file 1]

**Figure S1**

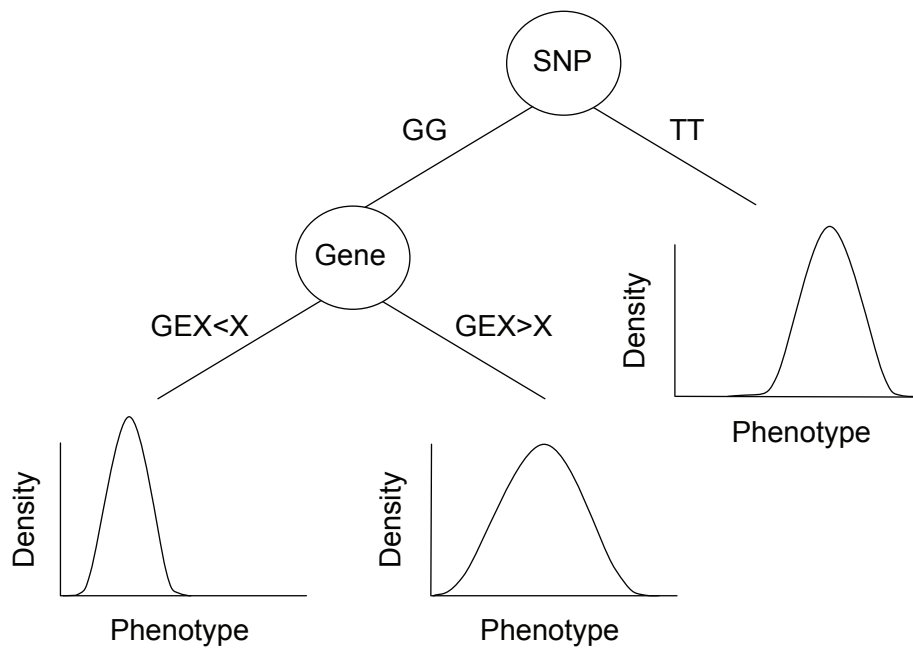

**Figure S1. An illustration of a standard decision tree model.** In this model, the internal nodes store the split functions based on either gene expression or genotyping data, while the leaf nodes provide the most probable phenotype based on a Gaussian model. Such tree has been previously utilized in (Lee *et al.* 2006), (Chen and Zhang 2013).
