# Supplementary material
Source: publisher figshare collection journal article supplement (https://gsajournals.figshare.com/articles/dataset/_/8949227)
Supplement: Supplementary file 9 [file 1]

Figure S5

A

|               | Genetic effect size |          |          |          |          |          |
|---------------|---------------------|----------|----------|----------|----------|----------|
|               | 0.5                 | 2        | 4        | 6        | 10       | 15       |
| Lasso         | 2.87E-29            | 1.13E-21 | 1.30E-18 | 2.55E-11 | 2.22E-29 | 2.70E-30 |
| Ridge         | 2.46E-30            | 2.13E-26 | 1.16E-26 | 1.26E-40 | 3.65E-33 | 2.41E-33 |
| Random Forest | 1.82E-23            | 5.45E-27 | 2.44E-17 | 1.56E-26 | 7.94E-29 | 8.92E-24 |
| Elastic Net   | 8.28E-30            | 4.55E-24 | 7.09E-23 | 2.76E-19 | 8.34E-32 | 4.74E-31 |
| mgRF          | 8.10E-07            | 1.50E-05 | 1.57E-05 | 1.37E-11 | 1.07E-22 | 4.70E-24 |

|               | Noise level |          |          |          |          |          |
|---------------|-------------|----------|----------|----------|----------|----------|
|               | 0.2         | 0.4      | 1        | 1.5      | 3        | 5        |
| Lasso         | 1.33E-26    | 1.13E-21 | 7.75E-23 | 1.77E-19 | 2.65E-08 | 0.000243 |
| Ridge         | 1.58E-29    | 2.13E-26 | 8.79E-27 | 4.93E-26 | 3.40E-30 | 1.35E-24 |
| Random Forest | 9.47E-30    | 5.45E-27 | 2.53E-27 | 7.77E-26 | 2.87E-30 | 1.75E-24 |
| Elastic Net   | 2.33E-28    | 4.55E-24 | 5.34E-25 | 3.39E-23 | 7.30E-18 | 9.40E-11 |
| mgRF          | 1.73E-06    | 1.50E-05 | 1.07E-08 | 2.87E-06 | 3.44E-07 | 4.17E-08 |

|               | Gene effect size |          |          |          |          |          |
|---------------|------------------|----------|----------|----------|----------|----------|
|               | 0.05             | 0.1      | 0.15     | 0.2      | 0.3      | 0.45     |
| Lasso         | 8.68E-09         | 1.62E-26 | 1.68E-20 | 1.66E-28 | 1.29E-24 | 2.87E-29 |
| Ridge         | 1.15E-23         | 6.38E-29 | 4.72E-26 | 8.79E-31 | 1.08E-25 | 2.46E-30 |
| Random Forest | 8.23E-16         | 1.40E-21 | 2.13E-19 | 1.52E-21 | 9.55E-18 | 1.82E-23 |
| Elastic Net   | 5.50E-16         | 5.98E-31 | 1.73E-23 | 4.97E-30 | 4.48E-25 | 8.28E-30 |
| mgRF          | 3.68E-07         | 8.27E-07 | 2.52E-06 | 8.72E-10 | 2.35E-07 | 8.10E-07 |

B

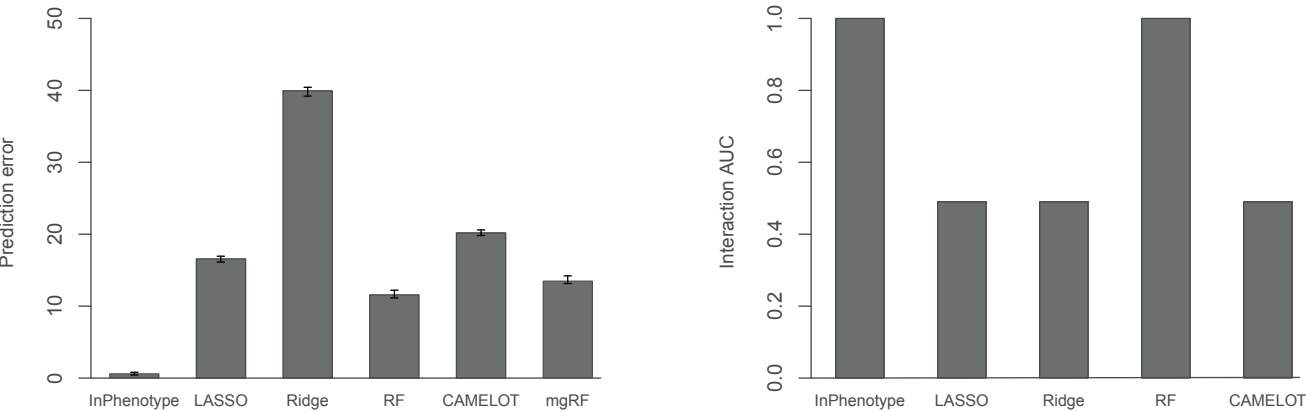

**Figure S5. Performance comparisons.** (A) Shown are P-values of paired *t*-tests when comparing prediction errors of InPhenotype to prediction errors of other methods (rows) using one causal SNP. Each column refers to a different genetic effect size (**top left**), noise level (**top right**) and gene effect size (**bottom**). (B) prediction errors (**left**) and interaction AUCs (**right**) of various methods, for the simulation of joint gene-locus effect in the presence of epistasis.
