# Supplementary material
Source: publisher figshare collection journal article supplement (https://gsajournals.figshare.com/articles/dataset/_/8949227)

Figure S4

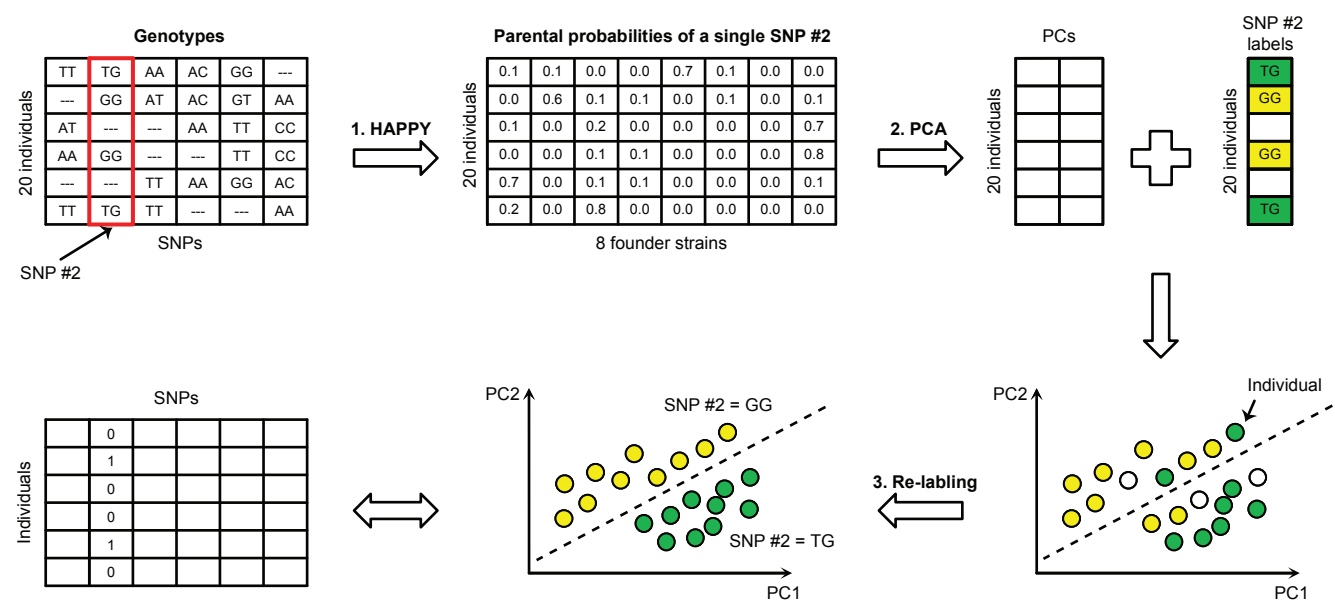

Figure S4. Illustration of the haplotype probabilities discretization pipeline.

Supplement: Supplementary file 7 [file 1]
